# Supplementary material for: TiO2 nanoparticles affect the bacterial community structure and Eisenia fetida (Savigny, 1826) in an arable soil
Source: PeerJ. 2019 Jul 25;7:e6939. doi: 10.7717/peerj.6939 (PMC6661143; doi:10.7717/peerj.6939)
Supplement: Supplemental Information 13 — Number of juveniles of Eisenia fetida along the 90 day incubation. [file peerj-07-6939-s013.xls]

## Sheet: Con
Water holding capacity (g kg-1 soil)
	Time (days)

## Sheet: data
	TRAT	DAY	Juv	earth			TRAT	DAY	CRA	sCRA			Group.1	Group.2	Group.3	earth	coc	juv	casc				Group.1	Group.2	Group.3	earth	coc	juv	casc
31	lomn0d0	0	0	0		1	alon0d0	0	9.369	0.00240416		1	worm	0	0	10	0	0	0		1	worm	0	0	0	0	0	0	0.777817
32	lomn0d15	15	0	0		2	alon0d15	15	10.8263	2.66362		2	worm	0	15	10	0	0	0		7	worm	0	15	0	0	0	0	4.24539
33	lomn0d30	30	0	0		3	alon0d30	30	9.88033	0.412632		3	worm	0	30	10	0	0	0		13	worm	0	30	0	0	0	0	18.625
34	lomn0d60	60	0	0		4	alon0d60	60	9.9784	1.64148		4	worm	0	60	10	0	0	0		19	worm	0	60	0	0	0	0	46.669
35	lomn0d90	90	1.33333	0.57735		5	alon0d90	90	9.67943	0.528329		5	worm	0	90	8	0.333333	1.33333	1.33333		25	worm	0	90	1	0.57735	1.52753	0.57735	24.2223
36	lomn1d0	0	0	0		6	alon1d0	0	9.90533	2.25822		6	worm	0.15	0	10	0	0	0		3	worm	0.15	0	0	0	0	0	14.3647
37	lomn1d15	15	0	0		7	alon1d15	15	9.54663	2.50858		7	worm	0.15	15	10	0	0	0		9	worm	0.15	15	0	0	0	0	9.47259
38	lomn1d30	30	0	0		8	alon1d30	30	9.9219	0.864018		8	worm	0.15	30	10	0	0	0		15	worm	0.15	30	0	0	0	0	19.582
39	lomn1d60	60	0	0.57735		9	alon1d60	60	9.9189	1.5133		9	worm	0.15	60	10	0.333333	0	0.333333		21	worm	0.15	60	0	0.57735	0	0.57735	46.8853
40	lomn1d90	90	0.333333	1		10	alon1d90	90	11.1839	1.60023		10	worm	0.15	90	5.33333	0	0.333333	1		27	worm	0.15	90	4.72582	0	0.57735	1	4.59239
41	lomn3d0	0	0	0		11	alon3d0	0	9.27773	0.799032		11	worm	0.3	0	10	0	0	0		5	worm	0.3	0	0	0	0	0	17.9962
42	lomn3d15	15	0	0		12	alon3d15	15	8.53063	0.916344		12	worm	0.3	15	10	0.333333	0	0		11	worm	0.3	15	0	0.57735	0	0	8.41843
43	lomn3d30	30	0	0		13	alon3d30	30	9.85423	0.826453		13	worm	0.3	30	10	0	0	0		17	worm	0.3	30	0	0	0	0	12.797
44	lomn3d60	60	0	0		14	alon3d60	60	12.3636	2.82114		14	worm	0.3	60	10	0	0	0		23	worm	0.3	60	0	0	0	0	39.1737
45	lomn3d90	90	0.666667	0.57735		15	alon3d90	90	9.6457	0.85946		15	worm	0.3	90	5.66667	0.666667	0.666667	0.333333		29	worm	0.3	90	2.08167	0.57735	0.57735	0.57735	13.8025
46	alon0d0	0	0	0		16	aven0d0	0	8.27853	1.61603		16	worm.oat	0	0	10	0	0	0		2	worm.oat	0	0	0	0	0	0	9.18822
47	alon0d15	15	0.333333	0		17	aven0d15	15	7.93145	1.42998		17	worm.oat	0	15	9.66667	0.333333	0.333333	0		8	worm.oat	0	15	0.57735	0.57735	0.57735	0	0.494975
48	alon0d30	30	0	0		18	aven0d30	30	10.1889	2.31701		18	worm.oat	0	30	10	4	0	0		14	worm.oat	0	30	0	4	0	0	6.6053
49	alon0d60	60	21.6667	3.60555		19	aven0d60	60	9.19557	0.0750901		19	worm.oat	0	60	10	26.3333	21.6667	4		20	worm.oat	0	60	0	2.08167	6.50641	3.60555	10.75
50	alon0d90	90	35.6667	5.2915		20	aven0d90	90	9.62177	0.809771		20	worm.oat	0	90	9.66667	8	35.6667	7		26	worm.oat	0	90	0.57735	7	18.5023	5.2915	29.6583
51	alon1d0	0	0	0		21	aven1d0	0	8.8595	1.7191		21	worm.oat	0.15	0	10	0	0	0		4	worm.oat	0.15	0	0	0	0	0	13.0523
52	alon1d15	15	0	0		22	aven1d15	15	7.95037	0.327097		22	worm.oat	0.15	15	10	0	0	0		10	worm.oat	0.15	15	0	0	0	0	3.79868
53	alon1d30	30	0	0		23	aven1d30	30	9.9841	0.279379		23	worm.oat	0.15	30	10	8	0	0		16	worm.oat	0.15	30	0	5.19615	0	0	11.5768
54	alon1d60	60	24.3333	6.02771		24	aven1d60	60	9.143	0.914002		24	worm.oat	0.15	60	10	35.6667	24.3333	10.6667		22	worm.oat	0.15	60	0	5.50757	12.8582	6.02771	12.6437
55	alon1d90	90	62	1.52753		25	aven1d90	90	9.04687	1.55624		25	worm.oat	0.15	90	9.66667	13	62	7.33333		28	worm.oat	0.15	90	0.57735	1	16.7033	1.52753	24.1669
56	alon3d0	0	0	0		26	aven3d0	0	9.31493	0.490347		26	worm.oat	0.3	0	10	0	0	0		6	worm.oat	0.3	0	0	0	0	0	15.7621
57	alon3d15	15	0	0		27	aven3d15	15	9.29765	0.768272		27	worm.oat	0.3	15	10	0.333333	0	0		12	worm.oat	0.3	15	0	0.57735	0	0	5.37401
58	alon3d30	30	0	0		28	aven3d30	30	10.3797	2.07372		28	worm.oat	0.3	30	10	13.6667	0	0		18	worm.oat	0.3	30	0	2.3094	0	0	20.6988
59	alon3d60	60	22	2.08167		29	aven3d60	60	8.67873	1.6925		29	worm.oat	0.3	60	10	31	22	6.66667		24	worm.oat	0.3	60	0	6.08276	6.245	2.08167	15.9061
60	alon3d90	90	54	2.64575		30	aven3d90	90	11.271	1.54478		30	worm.oat	0.3	90	10.3333	12.3333	54	4		30	worm.oat	0.3	90	0.57735	5.1316	17.5214	2.64575	17.0561
