# Supplementary material for: TiO2 nanoparticles affect the bacterial community structure and Eisenia fetida (Savigny, 1826) in an arable soil
Source: PeerJ. 2019 Jul 25;7:e6939. doi: 10.7717/peerj.6939 (PMC6661143; doi:10.7717/peerj.6939)
Supplement: Supplemental Information 15 — Raw data for Organic Carbon content along the 90 day incubation. [file peerj-07-6939-s015.xls]

## Sheet: Fig
Total organic C (g kg-1 soil)
	Time (days)	Time (days)

## Sheet: data
	TRAT	DAY	TOC	sTOC			TRAT	DAY	TOC	sTOC			Group.1	Group.2	Group.3	day	TOC	pH	EC	WHC	NO2	NO3			Group.1	Group.2	Group.3	day	TOC	pH	EC	WHC	NO2	NO3
31	conn0d0	0	7.53	1.12		1	alon0d0	0	8.64	1.26		1	alo	0	0	0	8.64	7.63	1.2	202.67	4.57	24.8		1	alo	0	0	0	1.26	0.15	0.51	11.59	1.47	13.43
32	conn0d15	15	9.28	1.92		2	alon0d15	15	10.83	2.66		2	alo	0	15	15	10.83	7.8	0.95	215	1.2	4.67		2	alo	0	15	0	2.66	0.11	0.33	92.8	0.78	4.25
33	conn0d30	30	9.34	0.72		3	alon0d30	30	9.88	0.41		3	alo	0	30	30	9.88	7.71	1.58	218.67	2.6	51.2		3	alo	0	30	0	0.41	0.17	0.2	7.02	2.23	18.62
34	conn0d60	60	9.02	1.3		4	alon0d60	60	9.87	1.18		4	alo	0	60	60	9.87	7.17	2.57	266.67	2.43	87.8		4	alo	0	60	0	1.18	0.1	0.55	17.95	2.4	33.46
35	conn0d90	90	9.05	0.66		5	alon0d90	90	9.68	0.53		5	alo	0	90	90	9.68	7.27	4	220.67	2.53	153.8		5	alo	0	90	0	0.53	0.21	0.48	19.01	0.31	24.22
36	conn1d0	0	8.41	0.93		6	alon1d0	0	9.91	2.26		6	alo	1	0	0	9.91	7.65	1.12	178.33	5.13	24.37		6	alo	1	0	0	2.26	0.06	0.26	22.03	0.96	14.36
37	conn1d15	15	8.65	1.17		7	alon1d15	15	9.55	2.51		7	alo	1	15	15	9.55	7.77	1.21	226.33	1.67	6.9		7	alo	1	15	0	2.51	0.23	0.52	86.64	1.87	9.47
38	conn1d30	30	9.6	0.75		8	alon1d30	30	9.92	0.86		8	alo	1	30	30	9.92	7.9	1.06	184.33	1.47	25.87		8	alo	1	30	0	0.86	0.25	0.18	24.85	0.95	19.58
39	conn1d60	60	8.76	1.84		9	alon1d60	60	9.92	1.51		9	alo	1	60	60	9.92	7.39	2.72	296.33	3.6	92.7		9	alo	1	60	0	1.51	0.18	0.82	47.35	2.14	46.89
40	conn1d90	90	8.34	1.97		10	alon1d90	90	11.18	1.6		10	alo	1	90	90	11.18	7.21	3.96	214.67	3.7	135.7		10	alo	1	90	0	1.6	0.3	0.21	68.86	1.75	4.59
41	conn3d0	0	8.34	0.88		11	alon3d0	0	9.28	0.8		11	alo	3	0	0	9.28	7.59	1.32	194	3.4	26.33		11	alo	3	0	0	0.8	0.06	0.48	27.07	1.55	18
42	conn3d15	15	9.01	1.48		12	alon3d15	15	8.53	0.92		12	alo	3	15	15	8.53	7.9	1.03	162	0.9	8.2		12	alo	3	15	0	0.92	0.09	0.25	34.83	0.52	8.42
43	conn3d30	30	9.23	0.9		13	alon3d30	30	9.85	0.83		13	alo	3	30	30	9.85	7.74	1.48	205	1.33	53.97		13	alo	3	30	0	0.83	0.1	0.35	33.87	0.45	12.8
44	conn3d60	60	9.43	0.65		14	alon3d60	60	11.8	2.22		14	alo	3	60	60	11.8	7.62	2.18	242.67	3.3	64.53		14	alo	3	60	0	2.22	0.19	0.7	46.76	2.85	27.73
45	conn3d90	90	8.99	1.24		15	alon3d90	90	9.65	0.86		15	alo	3	90	90	9.65	7.2	3.54	254	4.73	127		15	alo	3	90	0	0.86	0.34	0.35	32.91	2.04	13.8
46	lomn0d0	0	8.98	1.32		16	aven0d0	0	8.28	1.62		16	ave	0	0	0	8.28	7.64	1.25	171.33	4.23	26.87		16	ave	0	0	0	1.62	0.09	0.38	29.3	1.33	9.19
47	lomn0d15	15	8.11	0.85		17	aven0d15	15	7.81	1.03		17	ave	0	15	15	7.81	7.58	1.21	209	2.13	8.73		17	ave	0	15	0	1.03	0.21	0.56	25.12	0.81	0.75
48	lomn0d30	30	9.83	1.03		18	aven0d30	30	10.19	2.32		18	ave	0	30	30	10.19	7.78	1.09	253.33	1.83	18.6		18	ave	0	30	0	2.32	0.18	0.49	15.31	0.49	6.61
49	lomn0d60	60	9.94	0.95		19	aven0d60	60	9.2	0.08		19	ave	0	60	60	9.2	7.5	1.71	285	1.33	65.63		19	ave	0	60	0	0.08	0.25	0.34	19.29	0.35	10.75
50	lomn0d90	90	8.79	1.63		20	aven0d90	90	9.62	0.81		20	ave	0	90	90	9.62	7.21	3.35	239	4.4	104.77		20	ave	0	90	0	0.81	0.3	0.64	52.94	2.17	29.66
51	lomn1d0	0	8.15	1.28		21	aven1d0	0	8.86	1.72		21	ave	1	0	0	8.86	7.6	1.16	195	4.77	29.43		21	ave	1	0	0	1.72	0.22	0.47	61.29	1.45	13.05
52	lomn1d15	15	7.77	0.73		22	aven1d15	15	7.95	0.33		22	ave	1	15	15	7.95	7.87	0.74	208.67	1	2.9		22	ave	1	15	0	0.33	0.18	0.07	19.04	1.06	3.8
53	lomn1d30	30	9.07	1.13		23	aven1d30	30	9.98	0.28		23	ave	1	30	30	9.98	7.8	0.78	187.67	2	27.77		23	ave	1	30	0	0.28	0.11	0.06	15.57	0.44	11.58
54	lomn1d60	60	9.93	0.91		24	aven1d60	60	9.14	0.91		24	ave	1	60	60	9.14	7.56	1.61	307	2.17	61.53		24	ave	1	60	0	0.91	0.23	0.1	14.18	1.53	12.64
55	lomn1d90	90	9.48	0.44		25	aven1d90	90	9.05	1.56		25	ave	1	90	90	9.05	7.1	2.62	232.33	4.47	100.2		25	ave	1	90	0	1.56	0.31	0.23	30.92	2.15	24.17
56	lomn3d0	0	9.26	2.03		26	aven3d0	0	9.31	0.49		26	ave	3	0	0	9.31	7.62	1.23	169.67	4	27.87		26	ave	3	0	0	0.49	0.21	0.4	64.13	1.5	15.76
57	lomn3d15	15	8.84	1.39		27	aven3d15	15	8.75	1.1		27	ave	3	15	15	8.75	7.49	0.88	234	2.1	7.47		27	ave	3	15	0	1.1	0.77	0.02	38.59	2.03	7.5
58	lomn3d30	30	10.39	1.31		28	aven3d30	30	10.38	2.07		28	ave	3	30	30	10.38	7.78	0.95	224.33	1.63	28.8		28	ave	3	30	0	2.07	0.13	0.24	64.83	0.45	20.7
59	lomn3d60	60	9.86	0.8		29	aven3d60	60	8.68	1.69		29	ave	3	60	60	8.68	7.47	1.87	394.67	1.7	86.73		29	ave	3	60	0	1.69	0.16	0.08	180.9	0.3	15.91
60	lomn3d90	90	9.13	1.07		30	aven3d90	90	11.27	1.54		30	ave	3	90	90	11.27	7.21	2.04	226.33	3.97	52.1		30	ave	3	90	0	1.54	0.11	0.63	30.55	0.78	17.06
												31	con	0	0	0	7.53	7.75	1.3	184.67	2.2	33.97		31	con	0	0	0	1.12	0.17	0.38	41.36	0.61	12.52
												32	con	0	15	15	9.28	7.96	1.04	186.33	1.8	28.03		32	con	0	15	0	1.92	0.08	0.07	32.65	0.46	3.91
												33	con	0	30	30	9.34	7.96	0.67	231.67	1.5	18.1		33	con	0	30	0	0.72	0.1	0.17	18.82	0.72	6.21
												34	con	0	60	60	9.02	7.87	1.17	320.67	0.73	39.97		34	con	0	60	0	1.3	0.26	0.13	4.93	0.35	7.8
												35	con	0	90	90	9.05	7.97	1.5	281.33	0.5	48.73		35	con	0	90	0	0.66	0.08	0.24	47.88	0.17	12.32
												36	con	1	0	0	8.41	7.73	1.31	182.33	2.47	34.9		36	con	1	0	0	0.93	0.19	0.55	28.59	0.57	10.91
												37	con	1	15	15	8.65	7.96	1.02	182.33	1.67	26.87		37	con	1	15	0	1.17	0.12	0.06	41.79	0.55	6.52
												38	con	1	30	30	9.6	7.93	0.78	222.67	1.2	16.53		38	con	1	30	0	0.75	0.11	0.1	15.28	0.17	6.37
												39	con	1	60	60	8.76	8	0.99	323.33	0.67	26.63		39	con	1	60	0	1.84	0.2	0.19	21.2	0.31	6.14
						10	RAS	28	733.75	33.634		40	con	1	90	90	8.34	7.95	1.26	207.67	0.53	33.33		40	con	1	90	0	1.97	0.14	0.21	45.46	0.15	6.41
												41	con	3	0	0	8.34	7.73	1.08	169.67	2.4	34.8		41	con	3	0	0	0.88	0.23	0.15	6.51	1.11	13.91
												42	con	3	15	15	9.01	7.96	1	211.67	1.53	24.27		42	con	3	15	0	1.48	0.1	0.04	68.24	0.23	8.6
												43	con	3	30	30	9.23	7.9	0.76	251	1.43	15.1		43	con	3	30	0	0.9	0.13	0.16	10.44	0.61	1.14
												44	con	3	60	60	9.43	7.93	0.85	327	0.7	35.3		44	con	3	60	0	0.65	0.18	0.17	20.66	0.2	20.25
												45	con	3	90	90	8.99	7.98	1.41	261	0.57	37.6		45	con	3	90	0	1.24	0.15	0.25	52.12	0.15	4.1
												46	lom	0	0	0	8.98	7.71	1.29	174	2.27	33.43		46	lom	0	0	0	1.32	0.17	0.32	28.84	0.47	10.01
												47	lom	0	15	15	8.11	7.8	1.34	177.67	1.7	38.5		47	lom	0	15	0	0.85	0.18	0.1	24.42	0.44	9.25
												48	lom	0	30	30	9.83	7.74	1.57	208	0.87	53.4		48	lom	0	30	0	1.03	0.1	0.11	12.53	0.06	9.14
												49	lom	0	60	60	9.94	7.64	2.43	300	0.63	89.33		49	lom	0	60	0	0.95	0.14	0.08	18.33	0.06	1.21
												50	lom	0	90	90	8.79	7.51	3.36	224.67	0.37	122.7		50	lom	0	90	0	1.63	0.17	0.2	37.5	0.06	8.9
												51	lom	1	0	0	8.15	7.72	1.18	211.33	2.83	36.67		51	lom	1	0	0	1.28	0.16	0.33	12.74	0.96	17.46
												52	lom	1	15	15	7.77	7.72	2.14	180.33	1.73	43		52	lom	1	15	0	0.73	0.14	1.18	33.61	0.49	5.65
												53	lom	1	30	30	9.07	7.71	1.51	161.33	0.7	50.87		53	lom	1	30	0	1.13	0.11	0.06	46.09	0.17	4.74
												54	lom	1	60	60	9.93	7.66	2.22	286	0.77	84.1		54	lom	1	60	0	0.91	0.15	0.12	44.31	0.15	4.59
												55	lom	1	90	90	9.48	7.62	2.15	246.33	0.63	93.3		55	lom	1	90	0	0.44	0.41	0.37	73.28	0.06	40.17
												56	lom	3	0	0	9.26	7.73	1.22	198.33	2.47	32		56	lom	3	0	0	2.03	0.13	0.46	41.88	0.99	13.96
												57	lom	3	15	15	8.84	7.83	1.39	186.33	1.53	36.77		57	lom	3	15	0	1.39	0.17	0.15	25.48	0.81	16.68
												58	lom	3	30	30	10.39	7.71	1.5	222	0.93	51.7		58	lom	3	30	0	1.31	0.12	0.14	10.15	0.06	4.94
												59	lom	3	60	60	9.86	7.6	2.03	259.33	0.8	75.47		59	lom	3	60	0	0.8	0.16	0.25	34.06	0.44	11.22
												60	lom	3	90	90	9.13	7.5	3.13	251	1.1	110.57		60	lom	3	90	0	1.07	0.15	0.62	55.33	0.17	17.01
