# Supplementary material for: TiO2 nanoparticles affect the bacterial community structure and Eisenia fetida (Savigny, 1826) in an arable soil
Source: PeerJ. 2019 Jul 25;7:e6939. doi: 10.7717/peerj.6939 (PMC6661143; doi:10.7717/peerj.6939)
Supplement: Supplemental Information 16 — Raw data for pH values along the 90 day incubation. [file peerj-07-6939-s016.xls]

## Sheet: Fig
pH
	Time (days)	Time (days)

## Sheet: data
	TRAT	DAY	pH	spH			TRAT	DAY	pH	spH			Group.1	Group.2	Group.3	day	TOC	pH	EC	WHC	NO2	NO3			Group.1	Group.2	Group.3	day	TOC	pH	EC	WHC	NO2	NO3
31	conn0d0	0	7.74667	0.167432		1	alon0d0	0	7.63	0.149332		1	alo	0	0	0	8.64177	7.63	1.19733	202.667	4.56667	24.8		1	alo	0	0	0	1.25961	0.149332	0.514224	11.5902	1.47422	13.4347
32	conn0d15	15	7.95667	0.0750555		2	alon0d15	15	7.80333	0.112398		2	alo	0	15	15	10.8263	7.80333	0.951667	215	1.2	4.66667		2	alo	0	15	0	2.66362	0.112398	0.327967	92.7955	0.781025	4.24539
33	conn0d30	30	7.96	0.104403		3	alon0d30	30	7.71	0.165227		3	alo	0	30	30	9.88033	7.71	1.57667	218.667	2.6	51.2		3	alo	0	30	0	0.412632	0.165227	0.201966	7.02377	2.23383	18.625
34	conn0d60	60	7.86667	0.262742		4	alon0d60	60	7.16667	0.100167		4	alo	0	60	60	9.8681	7.16667	2.57	266.667	2.43333	87.8		4	alo	0	60	0	1.17632	0.100167	0.552517	17.9536	2.39653	33.4622
35	conn0d90	90	7.96667	0.0802081		5	alon0d90	90	7.27	0.208087		5	alo	0	90	90	9.67943	7.27	4.00333	220.667	2.53333	153.8		5	alo	0	90	0	0.528329	0.208087	0.475009	19.0088	0.305505	24.2223
36	conn1d0	0	7.73333	0.190351		6	alon1d0	0	7.65	0.0608276		6	alo	1	0	0	9.90533	7.65	1.11833	178.333	5.13333	24.3667		6	alo	1	0	0	2.25822	0.0608276	0.260489	22.0303	0.960902	14.3647
37	conn1d15	15	7.96333	0.123423		7	alon1d15	15	7.77	0.233024		7	alo	1	15	15	9.54663	7.77	1.21067	226.333	1.66667	6.9		7	alo	1	15	0	2.50858	0.233024	0.515652	86.6391	1.87172	9.47259
38	conn1d30	30	7.93333	0.112398		8	alon1d30	30	7.9	0.246374		8	alo	1	30	30	9.9219	7.9	1.05567	184.333	1.46667	25.8667		8	alo	1	30	0	0.864018	0.246374	0.176024	24.8462	0.950438	19.582
39	conn1d60	60	7.99667	0.195533		9	alon1d60	60	7.39333	0.180093		9	alo	1	60	60	9.9189	7.39333	2.72333	296.333	3.6	92.7		9	alo	1	60	0	1.5133	0.180093	0.816155	47.3533	2.13776	46.8853
40	conn1d90	90	7.95	0.141774		10	alon1d90	90	7.21	0.296142		10	alo	1	90	90	11.1839	7.21	3.95667	214.667	3.7	135.7		10	alo	1	90	0	1.60023	0.296142	0.210079	68.8573	1.75214	4.59239
41	conn3d0	0	7.73	0.225167		11	alon3d0	0	7.58667	0.064291		11	alo	3	0	0	9.27773	7.58667	1.31533	194	3.4	26.3333		11	alo	3	0	0	0.799032	0.064291	0.481245	27.074	1.55242	17.9962
42	conn3d15	15	7.96333	0.102632		12	alon3d15	15	7.90333	0.0907377		12	alo	3	15	15	8.53063	7.90333	1.02767	162	0.9	8.2		12	alo	3	15	0	0.916344	0.0907377	0.248969	34.8281	0.519615	8.41843
43	conn3d30	30	7.9	0.134536		13	alon3d30	30	7.73667	0.100167		13	alo	3	30	30	9.85423	7.73667	1.48467	205	1.33333	53.9667		13	alo	3	30	0	0.826453	0.100167	0.351534	33.8674	0.450925	12.797
44	conn3d60	60	7.92667	0.178979		14	alon3d60	60	7.61667	0.185023		14	alo	3	60	60	11.7956	7.61667	2.17967	242.667	3.3	64.5333		14	alo	3	60	0	2.22421	0.185023	0.699435	46.7582	2.85132	27.7291
45	conn3d90	90	7.97667	0.150111		15	alon3d90	90	7.20333	0.338575		15	alo	3	90	90	9.6457	7.20333	3.54	254	4.73333	127		15	alo	3	90	0	0.85946	0.338575	0.346987	32.909	2.04287	13.8025
46	lomn0d0	0	7.70667	0.165025		16	aven0d0	0	7.64	0.0916515		16	ave	0	0	0	8.27853	7.64	1.24633	171.333	4.23333	26.8667		16	ave	0	0	0	1.61603	0.0916515	0.375668	29.2973	1.33167	9.18822
47	lomn0d15	15	7.79667	0.17673		17	aven0d15	15	7.57667	0.210317		17	ave	0	15	15	7.81263	7.57667	1.205	209	2.13333	8.73333		17	ave	0	15	0	1.03188	0.210317	0.558801	25.1197	0.80829	0.750555
48	lomn0d30	30	7.74	0.0953939		18	aven0d30	30	7.77667	0.18037		18	ave	0	30	30	10.1889	7.77667	1.093	253.333	1.83333	18.6		18	ave	0	30	0	2.31701	0.18037	0.486461	15.308	0.493288	6.6053
49	lomn0d60	60	7.63667	0.141539		19	aven0d60	60	7.5	0.245561		19	ave	0	60	60	9.19557	7.5	1.71167	285	1.33333	65.6333		19	ave	0	60	0	0.0750901	0.245561	0.336012	19.2873	0.351188	10.75
50	lomn0d90	90	7.50667	0.174738		20	aven0d90	90	7.21	0.3005		20	ave	0	90	90	9.62177	7.21	3.35067	239	4.4	104.767		20	ave	0	90	0	0.809771	0.3005	0.637433	52.9434	2.17025	29.6583
51	lomn1d0	0	7.72	0.160935		21	aven1d0	0	7.59667	0.217332		21	ave	1	0	0	8.8595	7.59667	1.163	195	4.76667	29.4333		21	ave	1	0	0	1.7191	0.217332	0.468721	61.2944	1.45029	13.0523
52	lomn1d15	15	7.71667	0.141539		22	aven1d15	15	7.86667	0.178979		22	ave	1	15	15	7.95037	7.86667	0.7365	208.667	1	2.9		22	ave	1	15	0	0.327097	0.178979	0.0665	19.0351	1.0583	3.79868
53	lomn1d30	30	7.71	0.108167		23	aven1d30	30	7.80333	0.111505		23	ave	1	30	30	9.9841	7.80333	0.775	187.667	2	27.7667		23	ave	1	30	0	0.279379	0.111505	0.0647148	15.5671	0.43589	11.5768
54	lomn1d60	60	7.65667	0.15308		24	aven1d60	60	7.55667	0.231589		24	ave	1	60	60	9.143	7.55667	1.61167	307	2.16667	61.5333		24	ave	1	60	0	0.914002	0.231589	0.0965419	14.1774	1.5308	12.6437
55	lomn1d90	90	7.62	0.406325		25	aven1d90	90	7.10333	0.313422		25	ave	1	90	90	9.04687	7.10333	2.622	232.333	4.46667	100.2		25	ave	1	90	0	1.55624	0.313422	0.225861	30.9246	2.14554	24.1669
56	lomn3d0	0	7.73333	0.130512		26	aven3d0	0	7.62	0.21		26	ave	3	0	0	9.31493	7.62	1.225	169.667	4	27.8667		26	ave	3	0	0	0.490347	0.21	0.395	64.1275	1.5	15.7621
57	lomn3d15	15	7.82667	0.170392		27	aven3d15	15	7.48667	0.769502		27	ave	3	15	15	8.7472	7.48667	0.8775	234	2.1	7.46667		27	ave	3	15	0	1.09732	0.769502	0.0215	38.5876	2.02978	7.50022
58	lomn3d30	30	7.71333	0.116762		28	aven3d30	30	7.77667	0.130512		28	ave	3	30	30	10.3797	7.77667	0.946333	224.333	1.63333	28.8		28	ave	3	30	0	2.07372	0.130512	0.236855	64.8254	0.450925	20.6988
59	lomn3d60	60	7.60333	0.162583		29	aven3d60	60	7.47333	0.161658		29	ave	3	60	60	8.67873	7.47333	1.868	394.667	1.7	86.7333		29	ave	3	60	0	1.6925	0.161658	0.0840714	180.899	0.3	15.9061
60	lomn3d90	90	7.50333	0.150444		30	aven3d90	90	7.21333	0.113725		30	ave	3	90	90	11.271	7.21333	2.04067	226.333	3.96667	52.1		30	ave	3	90	0	1.54478	0.113725	0.633175	30.5505	0.776745	17.0561
												31	con	0	0	0	7.5258	7.74667	1.303	184.667	2.2	33.9667		31	con	0	0	0	1.11507	0.167432	0.3759	41.3562	0.608276	12.5237
												32	con	0	15	15	9.27557	7.95667	1.041	186.333	1.8	28.0333		32	con	0	15	0	1.91552	0.0750555	0.072856	32.6548	0.458258	3.91067
												33	con	0	30	30	9.34327	7.96	0.669	231.667	1.5	18.1		33	con	0	30	0	0.721125	0.104403	0.170367	18.8237	0.72111	6.20725
												34	con	0	60	60	9.02197	7.86667	1.17233	320.667	0.733333	39.9667		34	con	0	60	0	1.29965	0.262742	0.128048	4.93288	0.351188	7.80342
												35	con	0	90	90	9.0523	7.96667	1.50133	281.333	0.5	48.7333		35	con	0	90	0	0.661091	0.0802081	0.235118	47.8783	0.173205	12.3217
												36	con	1	0	0	8.4136	7.73333	1.31367	182.333	2.46667	34.9		36	con	1	0	0	0.933517	0.190351	0.552037	28.589	0.568624	10.9124
												37	con	1	15	15	8.65377	7.96333	1.01867	182.333	1.66667	26.8667		37	con	1	15	0	1.17269	0.123423	0.0617117	41.7892	0.550757	6.51869
												38	con	1	30	30	9.59907	7.93333	0.777	222.667	1.2	16.5333		38	con	1	30	0	0.750299	0.112398	0.102825	15.2753	0.173205	6.36894
												39	con	1	60	60	8.75577	7.99667	0.992333	323.333	0.666667	26.6333		39	con	1	60	0	1.8365	0.195533	0.185025	21.1975	0.305505	6.14356
						10	RAS	28	733.75	33.634		40	con	1	90	90	8.3369	7.95	1.26333	207.667	0.533333	33.3333		40	con	1	90	0	1.96718	0.141774	0.210571	45.4569	0.152753	6.40651
												41	con	3	0	0	8.3444	7.73	1.079	169.667	2.4	34.8		41	con	3	0	0	0.881757	0.225167	0.154696	6.50641	1.11355	13.9072
												42	con	3	15	15	9.0118	7.96333	0.995	211.667	1.53333	24.2667		42	con	3	15	0	1.48222	0.102632	0.0441928	68.2447	0.23094	8.59903
												43	con	3	30	30	9.22883	7.9	0.762667	251	1.43333	15.1		43	con	3	30	0	0.900376	0.134536	0.15982	10.4403	0.61101	1.13578
												44	con	3	60	60	9.42787	7.92667	0.853	327	0.7	35.3		44	con	3	60	0	0.645593	0.178979	0.174319	20.664	0.2	20.2457
												45	con	3	90	90	8.98933	7.97667	1.40667	261	0.566667	37.6		45	con	3	90	0	1.24258	0.150111	0.250857	52.1153	0.152753	4.10366
												46	lom	0	0	0	8.98043	7.70667	1.29	174	2.26667	33.4333		46	lom	0	0	0	1.31688	0.165025	0.321	28.8444	0.472582	10.0132
												47	lom	0	15	15	8.10803	7.79667	1.33967	177.667	1.7	38.5		47	lom	0	15	0	0.845637	0.17673	0.0975722	24.4199	0.43589	9.24554
												48	lom	0	30	30	9.8326	7.74	1.57	208	0.866667	53.4		48	lom	0	30	0	1.026	0.0953939	0.110485	12.53	0.057735	9.13947
												49	lom	0	60	60	9.94127	7.63667	2.42833	300	0.633333	89.3333		49	lom	0	60	0	0.945375	0.141539	0.0803077	18.3303	0.057735	1.20554
												50	lom	0	90	90	8.787	7.50667	3.36	224.667	0.366667	122.7		50	lom	0	90	0	1.63128	0.174738	0.19975	37.5011	0.057735	8.90169
												51	lom	1	0	0	8.14517	7.72	1.176	211.333	2.83333	36.6667		51	lom	1	0	0	1.28314	0.160935	0.330454	12.741	0.960902	17.4626
												52	lom	1	15	15	7.76583	7.71667	2.14067	180.333	1.73333	43		52	lom	1	15	0	0.731242	0.141539	1.17907	33.6056	0.493288	5.65066
												53	lom	1	30	30	9.06903	7.71	1.506	161.333	0.7	50.8667		53	lom	1	30	0	1.13093	0.108167	0.0591946	46.0905	0.173205	4.73533
												54	lom	1	60	60	9.92533	7.65667	2.223	286	0.766667	84.1		54	lom	1	60	0	0.907449	0.15308	0.120578	44.3058	0.152753	4.59239
												55	lom	1	90	90	9.48107	7.62	2.152	246.333	0.633333	93.3		55	lom	1	90	0	0.439112	0.406325	0.367195	73.2757	0.057735	40.1658
												56	lom	3	0	0	9.25703	7.73333	1.223	198.333	2.46667	32		56	lom	3	0	0	2.02945	0.130512	0.456536	41.8848	0.986577	13.9567
												57	lom	3	15	15	8.83937	7.82667	1.38567	186.333	1.53333	36.7667		57	lom	3	15	0	1.39055	0.170392	0.1461	25.482	0.814453	16.6794
												58	lom	3	30	30	10.3912	7.71333	1.498	222	0.933333	51.7		58	lom	3	30	0	1.30884	0.116762	0.135503	10.1489	0.057735	4.94267
												59	lom	3	60	60	9.8596	7.60333	2.02833	259.333	0.8	75.4667		59	lom	3	60	0	0.795778	0.162583	0.248918	34.0637	0.43589	11.2184
												60	lom	3	90	90	9.125	7.50333	3.12767	251	1.1	110.567		60	lom	3	90	0	1.06862	0.150444	0.623503	55.3263	0.173205	17.0063
